# Supplementary material for: Functional Assays and Metagenomic Analyses Reveals Differences between the Microbial Communities Inhabiting the Soil Horizons of a Norway Spruce Plantation
Source: PLoS One. 2013 Feb 13;8(2):e55929. doi: 10.1371/journal.pone.0055929 (PMC3572175; doi:10.1371/journal.pone.0055929)
Supplement: Table S1 — Summary of the enzymatic assays performed on soil solutions from the organic and mineral horizons. (DOC) [file pone.0055929.s001.doc]

**Table S1:** Summary of the enzymatic assays performed on soil solutions from the organic and mineral horizons.

|  | **Soil horizon** | |  |
| --- | --- | --- | --- |
| **Soil solution** | **Organic (AV)*** | **Mineral (AV)** | statistics |
| ***Ecoplate based tests*** |  |  |  |
| Pyruvic acid methyl ester | 1.020.14 | 0.470.04 | O>M, *P*=0.009 |
| Tween 40 | 0.900.02 | 0.600.06 | O>M, *P*=0.004 |
| Tween 80 | 0.760.05 | 0.610.06 | ns |
| -cyclodextrin | 0.020.004 | 0.010.007 | ns |
| glycogen | 0.030.004 | 0.020.006 | ns |
| D-Cellobiose | 0.280.1 | 0.010.005 | O>M, *P*=0.045 |
| -D-Lactose | 0.750.4 | 0.0020.002 | ns |
| B-Methyl-D-glucoside | 1.510.32 | 0.270.24 | O>M, *P*=0.02 |
| D-Xylose | 0.720.23 | 0.010.003 | O>M, *P*=0.02 |
| L-Erythritol | 0.180.03 | 0.0040.002 | O>M, *P*=0.0029 |
| D-Mannitol | 1.550.09 | 0.920.1 | O>M, *P*=0.004 |
| N-Acetyl-D-Glucosamine | 1.680.15 | 0.570.25 | O>M, *P*=0.01 |
| D-Glucosaminic acid | 1.110.17 | 0.160.05 | O>M, *P*=0.0019 |
| Glucose-1-phosphate | 0.780.28 | 0.120.11 | O>M, *P*=0.007 |
| D,L--Glycerol phosphate | 0.390.05 | 0.120.1 | ns |
| D-galactonic acid -lactone | 1.000.04 | 0.280.11 | O>M, *P*=0.0012 |
| D-galacturonic acid | 1.510.05 | 0.050.04 | O>M, *P*=0.0001 |
| 2-Hydroxy benzoic acid | 0.0040.003 | 0.00450.004 | ns |
| 4-Hydroxy benzoic acid | 0.130.03 | 0.030.01 | O>M, *P*=0.043 |
| -hydroxybutyic acid | 0.160.13 | 0.00490.003 | ns |
| Itaconic acid | 1.230.11 | 0.160.05 | O>M, *P*=0.0001 |
| -Ketobutyric acid | 0.020.006 | 0.040.01 | ns |
| D-Malic acid | 0.500.33 | 0.00060.0005 | ns |
| L-arginine | 0.680.07 | 0.250.06 | O>M, *P*=0.0044 |
| L-asparagine | 1.830.11 | 0.850.12 | O>M, *P*=0.0014 |
| L-Phenylalanine | 0.090.005 | 0.030.008 | O>M, *P*=0.001 |
| L-serine | 1.570.24 | 0.450.06 | O>M, *P*=0.0045 |
| L-threonine | 0.030.007 | 0.010.003 | O>M, *P*=0.025 |
| Glycyl-L-Glutamic acid | 0.150.04 | 0.030.02 | O>M, *P*=0.046 |
| Phenylethyl-amine | 0.360.17 | 0.010.006 | ns |
| Putresceine | 0.460.09 | 0.240.1 | ns |
| ***Enzymatic tests*** |  |  |  |
| Laccase | 0.800.016 | 0.080.003 | O>M, *P*=0.0041 |
| Phosphatase | 782102214 | 4221449 | O>M, *P*=0.0004 |
| Glucosidase | 10358310 | 1225207 | O>M, *P*=0.0024 |
| Exochitinase | 5820139 | 51261 | O>M, *P*=0.0001 |
| Xylosidase | 111811070 | 2424254 | O>M, *P*=0.003 |
| Cellobiohydrolase | 1615182 | 37464 | O>M, *P*=0.0038 |

* AV means absorbance values measured for each enzymatic assay at the appropriate OD (see Material and methods section). A one factor (soil horizon) ANOVA was applied on the absorbance values obtained in the assays and results are presented in the column entitled ‘statistics. Ns: non-significant differences. The enzymatic activity for which a significant effect of the soil horizon was observed are presented. O>M means significantly more efficient in the organic (O) horizon than in the mineral (M) horizon.
