# Supplementary material for: Functional Assays and Metagenomic Analyses Reveals Differences between the Microbial Communities Inhabiting the Soil Horizons of a Norway Spruce Plantation
Source: PLoS One. 2013 Feb 13;8(2):e55929. doi: 10.1371/journal.pone.0055929 (PMC3572175; doi:10.1371/journal.pone.0055929)
Supplement: Table S2 — Average distribution of the CAZYMES detected in the organic and mineral horizons. The table presents the relative distribution (%) of the sequences assigned in CAZYMES categories (GT, CBM, GH, PL and CE). (XLSX) [file pone.0055929.s002.xlsx]

## Sheet: Feuil1
	CAZymes	Mineral soil horizon	Organic soil horizon
1	GT2	16.0142	14.1435	relative abundance
2	GT4	12.5889	10.7754
3	GH13	3.78057	4.1419
4	CBM48	3.56328	3.22359
5	GT41	3.31533	3.19102
6	CBM6	2.80302	2.56446
7	CE10	2.67285	2.85911
8	CBM13	2.35902	2.42814
9	GH3	2.20379	2.67452	sum	sum
10	CE4	2.10664	1.822	51.4076	47.8236
11	CBM47	2.10264	1.94221
12	GT51	1.81048	1.41997
13	CBM32	1.76795	1.92087
14	CE1	1.68379	1.85485
15	CBM2	1.50147	1.27076
16	GH4	1.45172	1.53955
17	GH23	1.38189	1.43491
18	GH18	1.27012	1.33343
19	GH92	1.19811	1.43689
20	GH78	1.10771	1.36912
21	GH15	1.10362	0.948866
22	CBM50	1.10198	0.974539
23	CE11	1.08375	1.08074
24	GH2	1.07032	1.5194
25	GT35	0.898436	0.934371	71.9416	68.804
26	GT84	0.892188	0.979591
27	GH94	0.806536	0.840591
28	CE14	0.778222	0.609668
29	GT83	0.74613	0.805446
30	GT9	0.745139	0.646008
31	CBM57	0.725078	0.529499
32	GH57	0.698622	0.474895
33	GT28	0.672579	0.64413
34	GH53	0.654517	0.587639
35	GT30	0.648415	0.629494
36	GH43	0.58974	0.836019
37	GH16	0.573071	0.685376
38	GH5	0.555811	0.646782
39	GT26	0.542226	0.575431
40	CE9	0.541387	0.495116
41	GH74	0.504217	0.408584
42	GH87	0.480179	0.510362
43	GT20	0.469499	0.348919
44	GH1	0.463613	0.519914
45	GH31	0.456758	0.616798
46	GH20	0.45225	0.438526
47	CBM5	0.442495	0.420346
48	CBM20	0.441006	0.42004
49	GH39	0.427128	0.558769
50	CBM35	0.421546	0.484084
51	GT5	0.410199	0.338721
52	GH77	0.394711	0.424508
53	GH109	0.383895	0.319018
54	GH38	0.38241	0.456488
55	GH29	0.367335	0.558194
56	GT21	0.333905	0.371243
57	CBM12	0.332621	0.307087
58	GH36	0.320391	0.452127
59	GH51	0.291236	0.455377
60	GT47	0.2907	0.241035
61	GT1	0.289453	0.428816
62	GH76	0.282496	0.279093
63	GH10	0.259373	0.294666
64	GH27	0.248866	0.329124
65	CBM3	0.248193	0.222349
66	CBM10	0.23961	0.211993
67	GT19	0.233985	0.217427
68	CBM9	0.229363	0.224548
69	GH55	0.217284	0.369176
70	PL9	0.209194	0.231105
71	GH65	0.198756	0.199369
72	GH9	0.197922	0.365511
73	GT77	0.193641	0.124851
74	PL12	0.182299	0.12868
75	GH35	0.18031	0.356267
76	GH44	0.177839	0.148884
77	GT55	0.17675	0.155153
78	GH28	0.169071	0.382713
79	CBM16	0.166909	0.134513
80	GH116	0.144545	0.154601
81	GT22	0.143733	0.103298
82	GH106	0.142491	0.25164
83	GH103	0.142324	0.200939
84	CE3	0.140497	0.0945358
85	GT7	0.133463	0.104321
86	GH95	0.131383	0.248514
87	GT27	0.13083	0.153546
88	GH30	0.129806	0.173072
89	GH32	0.12941	0.159342
90	GH42	0.128223	0.224904
91	GT80	0.126765	0.139119
92	CE15	0.123747	0.197466
93	GH37	0.11783	0.170959
94	CBM51	0.115667	0.114013
95	GH8	0.111582	0.202996
96	GH105	0.11143	0.212706
97	GH24	0.106661	0.186892
98	GH63	0.102353	0.123984
99	CBM8	0.0992425	0.0836672
100	GH88	0.097926	0.0798856
101	GH12	0.0977797	0.104344
102	GH25	0.0972321	0.144542
103	CE6	0.0950701	0.146756
104	GT87	0.0925179	0.0793564
105	GH17	0.086454	0.113558
106	GH97	0.0827799	0.132353
107	GH99	0.08207	0.0929689
108	GH73	0.0816635	0.109766
109	GH102	0.0811814	0.0971919
110	GH84	0.0766295	0.0640533
111	CBM34	0.073503	0.0548542
112	GH79	0.0723215	0.149227
113	GH48	0.0717633	0.060061
114	GT39	0.0710532	0.0406078
115	GH26	0.0708148	0.0770825
116	GH11	0.06991	0.0808881
117	CBM26	0.0672871	0.0782195
118	PL4	0.0625781	0.118792
119	GH115	0.06202	0.173399
120	CBM56	0.0617869	0.0977456
121	CBM4	0.0599338	0.0451521
122	GH67	0.058671	0.120728
123	GH6	0.057636	0.0715022
124	CE8	0.0529322	0.128217
125	CBM1	0.0524499	0.0360772
126	GH19	0.0518864	0.0695085
127	GH33	0.0517239	0.0624522
128	CBM22	0.0515721	0.0678863
129	PL1	0.0502121	0.0843445
130	CBM42	0.0457306	0.0527376
131	PL11	0.0431078	0.0438784
132	CE12	0.0407072	0.079917
133	CBM41	0.0393418	0.0692874
134	CE7	0.0326492	0.0517413
135	GH50	0.0326331	0.0314816
136	GH47	0.031766	0.0419025
137	GH108	0.0284277	0.0423377
138	GH81	0.0276149	0.0370672
139	GH54	0.0263309	0.0787225
140	GT64	0.0260218	0.0190015
141	GH89	0.0244449	0.0487515
142	CBM38	0.0235508	0.0312782
143	GH113	0.0231498	0.0184558
144	GH46	0.0229873	0.00495957
145	GH34	0.0229114	0.0224493
146	GT81	0.0227488	0.0149454
147	CBM18	0.0220388	0.0402678
148	GT11	0.0209011	0.0224556
149	GT49	0.0201206	0.0152489
150	GT66	0.0200392	0.0173166
151	GH59	0.0197142	0.0360573
152	CBM25	0.018755	0.0222887
153	GT8	0.0166742	0.0194395
154	PL7	0.0165224	0.0140721
155	GT89	0.0153195	0.0105377
156	GH64	0.0151622	0.0319971
157	GT25	0.0135745	0.0243689
158	GH114	0.0132601	0.0136204
159	GH86	0.0130055	0.0130457
160	GT34	0.0127725	0.0288204
161	CBM33	0.012534	0.0206602
162	GH101	0.0118946	0.0123331
163	CE5	0.0114883	0.0220415
164	GT67	0.0113311	0.0234894
165	GT75	0.0110168	0.0110822
166	GH62	0.0108542	0.0239109
167	GH66	0.0107729	0.0332707
168	GT32	0.010697	0.0251179
169	GH93	0.00997632	0.0144634
170	GT10	0.00990044	0.0202387
171	PL8	0.00854026	0.0158186
172	GH45	0.00846437	0.00178914
173	GT57	0.00774368	0.00845752
174	PL21	0.00766239	0.00416666
175	CBM23	0.00702299	0.00640752
176	GH100	0.00686582	0.0184193
177	GT46	0.00686582	0.00104011
178	CE2	0.00645947	0.0154973
179	CBM14	0.00614504	0.016072
180	GT45	0.00567361	0.00691558
181	CBM44	0.00566821	0.00937343
182	GT71	0.00551104	0.0104073
183	GH75	0.0050288	0.015323
184	PL17	0.0050288	0.00295968
185	GT48	0.00494752	0.0797602
186	GH104	0.00487163	0
187	GT82	0.00486623	0.00753418
188	GT53	0.00471446	0.0111626
189	CBM30	0.00470906	0.00745386
190	PL6	0.00463318	0.00458817
191	GT14	0.00455189	0.013032
192	GT17	0.00422682	0.00403623
193	GH71	0.00406965	0.0185133
194	PL10	0.00391248	0.017279
195	GT31	0.0038312	0.00499601
196	GT76	0.00375531	0
197	GT90	0.0031105	0.00741741
198	CBM45	0.00303462	0.00170882
199	GH68	0.00303462	0.00474881
200	GH110	0.00295333	0.00549784
201	GT62	0.00295333	0.00491569
202	GH96	0.00287205	0.00253817
203	PL16	0.00287205	0.00104011
204	CBM27	0.00207547	0.00178914
205	GT3	0.00207547	0.00424698
206	PL15	0.00207547	0.00178914
207	PL5	0.00207547	0.00849396
208	CBM43	0.00199418	0.00287936
209	GH107	0.00199418	0.0026686
210	GH49	0.0019183	0.0026686
211	GT33	0.00183701	0.00287936
212	CBM37	0.00175573	0.00104011
213	PL14	0.00175573	0.00378903
214	CBM17	0.00111632	0
215	CBM28	0.00111632	0
216	CBM46	0.00111632	0.00170882
217	CE13	0.00111632	0.00474881
218	GH117	0.00111632	0.0043273
219	GH70	0.00111632	0.00491569
220	GH72	0.00111632	0.000959785
221	GT50	0.00111632	0.00245785
222	GT60	0.00111632	0.00395591
223	PL20	0.00111632	0
224	CBM19	0.00095915	0.00287936
225	GT6	0.00095915	0.00599967
226	GT74	0.00095915	0.00274892
227	PL3	0.00095915	0.00287936
228	CBM53	0.000877863	0.00170882
229	CBM54	0.000877863	0.0026686
230	GH61	0.000877863	0.00274892
231	GT13	0.000877863	0.00191957
232	GT18	0.000877863	0
233	CBM11	0	0.000959785
234	CBM21	0	0.00575871
235	CBM31	0	0.000959785
236	CBM55	0	0.00208021
237	CBM59	0	0.000959785
238	CE16	0	0.00074903
239	GH111	0	0.00287936
240	GH14	0	0.000959785
241	GH52	0	0.00720666
242	GH58	0	0.00074903
243	GH7	0	0.00199989
244	GH85	0	0.000959785
245	GH91	0	0.000959785
246	GH98	0	0.00199989
247	GT12	0	0.000959785
248	GT15	0	0.00170882
249	GT24	0	0.00341763
250	GT42	0	0.00199989
251	GT58	0	0.00357827
252	GT61	0	0.00370871
253	GT65	0	0.000959785
254	GT68	0	0.000959785
255	GT69	0	0.00149806
256	GT70	0	0.00191957
257	GT85	0	0.00370871
258	GT91	0	0.00074903
259	GT92	0	0.00170882
260	PL2	0	0.00499601
